# Supplementary material for: Evaluating gold standard corpora against gene/protein tagging solutions and lexical resources
Source: PubMed Central journal article supplement (PMC4021975; doi:10.1186/2041-1480-4-28), 2013-10-11
Supplement: 2041-1480-4-28-S1.pdf [file 2041-1480-4-28-S1.pdf]

## Supplementary Material

### Correlation matrices on FP and FN profiles

The following two tables give the correlation coefficients for the FP profiles and the FN profiles of a single tagging solutions against a selected GSC (using cos98 evaluation).

- Fig. 8: Correlation matrix for the FN errors.
- Fig. 9: Correlation matrix for the FP errors.

| FsuPrge |           |      | BC2    |       |           |       | PennBio |       |           |       | Jnlpba |       |           |       |           |
|---------|-----------|------|--------|-------|-----------|-------|---------|-------|-----------|-------|--------|-------|-----------|-------|-----------|
| Wh7     | SwissProt | GP7  | Chang2 | WH7   | SwissProt | GP7   | Chang2  | WH7   | SwissProt | GP7   | Chang2 | WH7   | SwissProt | GP7   |           |
| 0.35    | 0.20      | 0.02 | -0.07  | -0.15 | -0.14     | -0.11 | -0.01   | -0.12 | -0.12     | -0.13 | 0.09   | -0.03 | -0.05     | -0.15 | Chang2    |
|         | 0.40      | 0.12 | -0.17  | 0.03  | -0.01     | -0.20 | -0.08   | -0.15 | -0.11     | -0.15 | -0.03  | 0.03  | -0.13     | -0.20 | Wh7       |
|         |           | 0.04 | -0.17  | -0.02 | 0.18      | -0.13 | -0.13   | -0.09 | -0.10     | -0.13 | -0.14  | 0.00  | -0.02     | -0.14 | SwissProt |
|         |           |      | -0.11  | 0.03  | -0.05     | 0.05  | -0.13   | -0.13 | -0.13     | 0.05  | -0.09  | -0.15 | 0.03      | -0.07 | GP7       |
|         |           |      |        | 0.10  | 0.06      | 0.28  | -0.08   | -0.16 | -0.15     | -0.11 | -0.13  | -0.16 | -0.15     | -0.12 | Chang2    |
|         |           |      |        |       | 0.34      | 0.21  | -0.14   | -0.18 | -0.11     | -0.04 | -0.15  | 0.04  | -0.07     | -0.15 | WH7       |
|         |           |      |        |       |           | 0.10  | -0.17   | -0.18 | -0.08     | -0.12 | -0.18  | -0.05 | -0.11     | -0.18 | SwissProt |
|         |           |      |        |       |           |       | -0.11   | -0.16 | -0.11     | -0.07 | -0.16  | -0.20 | 0.00      | -0.08 | GP7       |
|         |           |      |        |       |           |       |         | 0.52  | 0.34      | 0.34  | 0.01   | -0.09 | -0.09     | -0.14 | Chang2    |
|         |           |      |        |       |           |       |         |       | 0.63      | 0.39  | -0.19  | -0.24 | -0.19     | -0.19 | WH7       |
|         |           |      |        |       |           |       |         |       |           | 0.33  | -0.09  | -0.23 | -0.07     | -0.17 | SwissProt |
|         |           |      |        |       |           |       |         |       |           |       | -0.14  | -0.15 | -0.09     | -0.13 | GP7       |
|         |           |      |        |       |           |       |         |       |           |       |        | 0.31  | 0.24      | 0.35  | Chang2    |
|         |           |      |        |       |           |       |         |       |           |       |        |       | 0.33      | 0.21  | WH7       |
|         |           |      |        |       |           |       |         |       |           |       |        |       |           | 0.29  | SwissProt |

Figure 8: (**Correlation matrix for FN profiles**): The matrix shows the pair-wise correlation of the FN error profiles from the different tagging experiments. Each listed PGN tagging solution has been tested on the available gold standard corpora and the FN results from the experiment each tagger-corpora pair have been collected, normalized and then compared. The highest correlation values are given for different PGN taggers against the same corpora.

| Chang2 |         |        | WH7     |       |         |        | SwissProt |       |         |        | GP7     |       |         |        |         |
|--------|---------|--------|---------|-------|---------|--------|-----------|-------|---------|--------|---------|-------|---------|--------|---------|
| BC2    | PennBio | Jnlpba | FsuPrge | BC2   | PennBio | Jnlpba | FsuPrge   | BC2   | PennBio | Jnlpba | FsuPrge | BC2   | PennBio | Jnlpba |         |
| -0.03  | 0.08    | 0.07   | 0.16    | -0.03 | 0.03    | 0.02   | -0.17     | -0.17 | -0.16   | -0.16  | 0.12    | -0.12 | -0.03   | 0.01   | FsuPrge |
|        | 0.00    | -0.08  | 0.02    | -0.06 | 0.11    | -0.05  | -0.11     | -0.11 | -0.02   | -0.11  | 0.05    | 0.22  | 0.13    | -0.10  | BC2     |
|        |         | -0.11  | -0.06   | -0.10 | 0.21    | -0.12  | -0.16     | -0.16 | -0.02   | -0.15  | -0.11   | -0.10 | 0.19    | -0.04  | PennBio |
|        |         |        | -0.06   | -0.12 | -0.16   | 0.36   | -0.18     | -0.18 | -0.17   | 0.08   | -0.09   | -0.09 | -0.14   | 0.19   | Jnlpba  |
|        |         |        |         | 0.32  | 0.23    | 0.15   | -0.06     | -0.07 | -0.11   | 0.05   | 0.01    | -0.10 | -0.08   | -0.08  | FsuPrge |
|        |         |        |         |       | 0.20    | -0.01  | -0.06     | 0.02  | -0.16   | -0.01  | -0.14   | -0.04 | -0.10   | -0.08  | BC2     |
|        |         |        |         |       |         | -0.02  | -0.08     | -0.11 | -0.07   | -0.05  | -0.03   | 0.12  | 0.37    | -0.12  | PennBio |
|        |         |        |         |       |         |        | -0.19     | -0.16 | -0.22   | 0.08   | -0.07   | -0.11 | -0.11   | 0.39   | Jnlpba  |
|        |         |        |         |       |         |        |           | 0.38  | 0.31    | 0.07   | -0.20   | -0.17 | -0.15   | -0.19  | FsuPrge |
|        |         |        |         |       |         |        |           |       | 0.28    | 0.06   | -0.07   | -0.10 | -0.10   | -0.23  | BC2     |
|        |         |        |         |       |         |        |           |       |         | 0.10   | -0.01   | -0.06 | 0.16    | -0.18  | PennBio |
|        |         |        |         |       |         |        |           |       |         |        | -0.15   | -0.18 | -0.10   | 0.06   | Jnlpba  |
|        |         |        |         |       |         |        |           |       |         |        |         | 0.49  | 0.31    | 0.17   | FsuPrge |
|        |         |        |         |       |         |        |           |       |         |        |         |       | 0.21    | 0.03   | BC2     |
|        |         |        |         |       |         |        |           |       |         |        |         |       |         | 0.02   | PennBio |

Figure 9: **(Correlation matrix for FP profiles):** The matrix has been generated in the same way as the correlation matrix in fig. 8, but it now contains the FP error profiles. The table is sorted according to the tagging solutions and the correlation between two tagger-corpus pairs tends to be positive, if the same tagger has been applied to two different corpora.

## Tables for FP and FN errors

The following tables list the most frequent FP and FN errors for selected tagging solutions.

- Fig. 10: FN results using exact matching.
- Fig. 11: FP results using exact matching.
- Fig. 12: FN results using cos98 matching.
- Fig. 13: FP results using cos98 matching.

|                 | FN - FsuPrge                                                                                                                                                  | FN - PennBio                                                                                                      | FN - BC2                                                                                                              | FN - Jnlpba                                                                                                                                                                            |
|-----------------|---------------------------------------------------------------------------------------------------------------------------------------------------------------|-------------------------------------------------------------------------------------------------------------------|-----------------------------------------------------------------------------------------------------------------------|----------------------------------------------------------------------------------------------------------------------------------------------------------------------------------------|
| Chang2<br>exact | 312 KIR, 278 cytokine, 215 cytokines, 203 kinase, 176 transcription factor, 165 transcription factors, 105 RNA polymerase, 74 protease, 71 APP, 65 HDL        | 586 K-ras, 385 ras, 329 p53, 303 beta-catenin, 277 polymerase, 252 N-ras, 200 MYCN, 187 N-myc, 115 c-kit, 100 APC | 8 neu, 5 GTPase-activating protein, 5 CREM, 5 LH, 5 chloramphenicol acetyltransferase, 4 CBF, 4 RAS, 4 E2, 4 CH, 4 Lp | 39 cytokines, 27 transcription factors, 16 glucocorticoid receptor, 15 GR, 14 cytokine, 13 glucocorticoid receptors, 11 antibodies, 11 LTR, 11 proteasome, 10 Glucocorticoid receptors |
| Wh7             | 278 cytokine, 233 KIR, 215 cytokines, 141 kinase, 131 transcription factors, 119 transcription factor, 108 Tat, 105 IL-1, 103 IL-12, 98 CD8                   | 450 N-myc, 404 N-ras, 273 polymerase, 157 c-kit, 136 MYCN, 81 VIP, 77 K-ras, 55 KIT, 53 N-RAS, 51 p73             | 20 CAT, 15 IgG, 12 c-Jun, 11 IgM, 10 IgA, 10 PU, 9 GH, 9 LH, 9 PI 3-kinase, 9 neu                                     | 69 NF-kappa B, 46 GR, 39 cytokines, 35 Tax, 27 IL-2 promoter, 26 transcription factors, 17 IL-12, 15 nuclear factor-kappaB, 15 ER, 15 AP-1 site                                        |
| SP              | 278 cytokine, 215 cytokines, 203 kinase, 188 NF-kappaB, 176 transcription factor, 172 RNA polymerase, 165 transcription factors, 108 Tat, 105 IL-1, 103 IL-12 | 902 K-ras, 450 N-myc, 404 N-ras, 277 polymerase, 181 H-ras, 81 VIP, 63 Wnt, 53 N-RAS, 46 c-fos, 38 kinase         | 15 IgG, 12 c-Jun, 11 IgM, 10 IgA, 10 PU, 9 E2, 9 GH, 9 LH, 9 RXR, 9 PI 3-kinase                                       | 86 NF-kappaB, 69 NF-kappa B, 46 GR, 39 cytokines, 35 Tax, 27 IL-2 promoter, 27 transcription factors, 17 IL-12, 15 nuclear factor-kappaB, 15 ER                                        |
| GP7             | 108 Tat, 71 Ig, 66 AR, 64 LDL, 47 sigmaK, 44 transcription factor, 40 sigma B, 40 SF-1, 38 gag, 36 sigma K                                                    | 124 K-ras, 98 ras, 81 VIP, 69 p53, 52 N-myc, 47 beta-catenin, 41 N-ras, 28 T3, 25 N, 24 telomerase                | 9 GH, 9 LH, 8 SH3, 7 SH2 domains, 6 Tat, 6 gag, 6 TCR, 5 NF-Y, 5 Rb, 4 Tax                                            | 46 GR, 35 Tax, 27 IL-2 promoter, 15 ER, 15 AP-1 site, 14 TCR, 12 IL-2 gene, 12 Gadd45gamma, 11 antibodies, 11 LTR                                                                      |

Table 10: **FN tagging errors (exact)** The table gives an overview on the most frequent errors that occurred when applying the tagger against the corpus. The evaluation is based on exact matching.

|        | FP - FsuPrge                                                                                                                      | FP - PennBio                                                                                                                                                 | FP - BC2                                                                                                                     | FP - Jnlpba                                                                                                              |
|--------|-----------------------------------------------------------------------------------------------------------------------------------|--------------------------------------------------------------------------------------------------------------------------------------------------------------|------------------------------------------------------------------------------------------------------------------------------|--------------------------------------------------------------------------------------------------------------------------|
| Chang2 | 35 p38, 34 KIR genes, 28 Ras, 25 SH2, 22 CK, 21 reverse transcriptase, 21 ARF, 20 HLA, 20 HDL-C, 20 TNF                           | 155 beta-catenin gene, 120 K-ras gene, 117 ras, 107 p53 gene, 97 ras gene, 95 K-ras mutation, 82 N-ras gene, 68 N-myc gene, 66 ras genes, 49 K-ras mutations | 4 C2, 4 CAT, 3 ferritin, 3 C1, 3 growth factor, 3 insulin, 3 Ras, 3 SH2, 2 T1N1, 2 ras                                       | 45 NF-kappaB, 39 CD4, 34 IL-2, 32 NF-kappa B, 25 AP-1, 20 IL-4, 20 p65, 18 CD3, 18 CD8, 18 CD28                          |
| Wh7    | 304 kinase, 155 HLA, 128 Jun, 121 class I, 109 IFN, 86 growth factor, 81 antigen, 69 collagen, 67 TNF, 66 SH2                     | 448 ras, 431 myc, 61 RAS, 53 fos, 39 N-myc oncogene, 38 Ha-ras, 37 kinase, 36 class I, 33 growth factor, 30 PrP                                              | 59 kinase, 26 Jun, 20 transcription factor, 17 antigen, 17 SH2, 15 Sp1, 12 EGF, 12 growth factor, 12 binding protein, 12 fos | 100 CD4, 99 IL-2, 62 NF-kappaB, 56 AP-1, 44 kinase, 37 Rel, 36 CD28, 34 p65, 29 IL-4, 27 CREB                            |
| SP     | 325 PCR, 152 a protein, 134 cyclin, 128 Jun, 99 phosphatase, 98 ORF, 98 Ca2, 94 Ras, 92 IFN, 90 tumor necrosis factor             | 1552 ras, 471 myc, 81 Ca2, 62 AMP, 62 HCC, 56 fos, 56 cyclin, 55 GGT                                                                                         | 33 cis, 26 Jun, 25 PCR, 21 a protein, 19 ORF, 18 cyclin, 17 SH2, 15 Sp1, 13 Asp, 13 EBP                                      | 100 CD4, 89 IL-2, 57 AP-1, 38 p65, 38 Rel, 37 CD28, 36 Th1, 31 EBP, 29 IL-4, 27 CREB                                     |
| GP7    | 1234 has, 940 mRNA, 725 receptor, 569 in vitro, 460 enzyme, 431 RNA, 431 cDNA, 417 Escherichia coli, 393 receptors, 388 conserved | 442 has, 406 mRNA, 360 PCR, 326 neural, 270 pancreatic, 232 receptor, 163 ras, 157 apoptosis, 152 oncogene, 140 cDNA                                         | 166 has, 95 cDNA, 75 serum, 74 RNA, 69 conserved, 67 mRNA, 61 in vitro, 60 plasma, 51 receptor, 46 kinase                    | 213 lymphocytes, 190 receptor, 113 has, 106 mRNA, 105 in vitro, 98 IL-2, 97 CD4, 89 apoptosis, 77 receptors, 74 lymphoid |

Table 11: **FP tagging errors (exact)** Similar to the previous table (cf. tbl. 10), this table shows the FP errors of the tagging solutions against the corpora. Again, exact matching has been used as evaluation measure.

|       | FN - FsuPrge                                                                                                                                                  | FN - PennBio                                                                                              | FN - BC2                                                                                    | FN - Jnlpba                                                                                                                                                                            |
|-------|---------------------------------------------------------------------------------------------------------------------------------------------------------------|-----------------------------------------------------------------------------------------------------------|---------------------------------------------------------------------------------------------|----------------------------------------------------------------------------------------------------------------------------------------------------------------------------------------|
| cos98 | 278 cytokine, 242 KIR, 215 cytokines, 203 kinase, 176 transcription factor, 165 transcription factors, 75 RNA polymerase, 74 protease, 60 APP, 59 p53         | 385 ras, 277 polymerase, catenin, 204 K-ras, 148 MYCN, 55 KIT, 41 N-myc, 40 c-myc                         | 8 neu, 5 chloramphenicol acetyltransferase, 4 CBF, 4 CREM, 4 CH, 4 prolactin, 3 D, 3 V, 3 S | 39 cytokines, 27 transcription factors, 16 glucocorticoid receptor, 15 GR, 14 cytokine, 13 glucocorticoid receptors, 11 proteasome, 11 antibodies, 11 LTR, 10 Glucocorticoid receptors |
| Wh7   | 278 cytokine, 233 KIR, 215 cytokines, 141 kinase, 131 transcription factors, 119 transcription factor, 105 IL-1, 103 IL-12, 98 CD8, 94 HDL                    | 404 N-ras, 403 N-myc, 273 polymerase, 157 c-kit, 136 MYCN, 81 VIP, 66 K-ras, 53 N-RAS, 51 p73, 50 KIT     | 20 CAT, 15 IgG, 11 IgM, 10 IgA, 9 neu, 9 PU, 9 NF-kappa B, 9 GH, 9 LH, 9 E1A                | 69 NF-kappa B, 46 GR, 39 cytokines, 35 Tax, 26 transcription factors, 17 IL-12, 15 nuclear factor-kappaB, 15 ER, 14 TCR, 14 cytokine                                                   |
| SP    | 278 cytokine, 215 cytokines, 203 kinase, 188 NF-kappaB, 176 transcription factor, 171 RNA polymerase, 165 transcription factors, 106 Tat, 105 IL-1, 103 IL-12 | 902 K-ras, 450 N-myc, 404 N-ras, 277 polymerase, 181 H-ras, 81 VIP, 63 Wnt, 53 N-RAS, 46 c-fos, 38 kinase | 15 IgG, 11 IgM, 10 IgA, 9 PU, 9 NF-kappa B, 9 GH, 9 LH, 9 MAP kinase, 9 E1A, 9 NF-kappaB    | 86 NF-kappaB, 69 NF-kappa B, 46 GR, 39 cytokines, 35 Tax, 27 transcription factors, 17 IL-12, 15 nuclear factor-kappaB, 15 ER, 14 TCR                                                  |
| GP7   | 92 Tat, 70 Ig, 65 AR, 64 LDL, 47 sigmaK, 44 transcription factor, 40 SF-1, 39 sigma B, 38 gag, 36 sigma K                                                     | 98 ras, 75 VIP, 69 p53, 28 T3, 24 telomerase, 21 N-MYC, 20 TH, 19 MK, 18 k-ras, 16 CRE                    | 9 GH, 9 LH, 8 SH3, 6 Tat, 6 gag, 6 TCR, 5 NF-Y, 5 Rb, 4 Tax, 4 SH3 domains                  | 46 GR, 35 Tax, 15 ER, 14 TCR, 12 Gadd45gamma, 11 antibodies, 11 LTR, 10 Cot kinase, 9 GRbeta, 9 IL-18Ralpha                                                                            |

Table 12: **FN tagging errors (cos98)** This table lists the FN errors for the tagging solutions against the gold standard corpora (based on cos98 matching).

|       | FP - FsuPrge                                                                                                                      | FP - PennBio                                                                                                                                                | FP - BC2                                                                                                                                  | FP - Jnlpba                                                                                                            |
|-------|-----------------------------------------------------------------------------------------------------------------------------------|-------------------------------------------------------------------------------------------------------------------------------------------------------------|-------------------------------------------------------------------------------------------------------------------------------------------|------------------------------------------------------------------------------------------------------------------------|
| cos98 | 35 p38, 28 Ras, 25 SH2, 22 CK, 21 reverse transcriptase, 20 HDL-C, 19 pp60, 18 HLA, 16 phox, 16 MHC                               | 155 beta-catenin gene, 117 ras, 107 p53 gene, 97 ras gene, 66 ras genes, 43 ras oncogenes, 33 p53 protein, 27 c-kit gene, 26 p53 mutations, 24 ras oncogene | 3 ferritin, 3 C1, 3 C2, 3 CAT, 3 growth factor, 3 insulin, 3 Ras, 2 T1N1, 2 ras, 2 OD1                                                    | 38 CD4, 38 NF-kappaB, 32 IL-2, 23 NF-kappa B, 22 AP-1, 20 p65, 18 CD8, 16 p50, 16 TCR, 15 IL-4                         |
| Wh7   | 304 kinase, 153 HLA, 113 class I, 86 growth factor, 81 antigen, 69 collagen, 63 class II, 63 binding protein, 62 SH2, 59 Jun      | 448 ras, 431 myc, 60 RAS, 53 fos, 37 kinase, 33 growth factor, 29 antigen, 27 class I, 24 Myc, 23 MYC                                                       | 59 kinase, 20 transcription factor, 17 antigen, 12 growth factor, 12 binding protein, 12 fos, 11 prolactin, 11 p53, 10 class I, 10 cyclin | 87 CD4, 44 kinase, 42 NF-kappaB, 41 IL-2, 34 p65, 28 AP-1, 25 p50, 25 transcription factor, 24 IL-4, 23 CD28           |
| SP    | 325 PCR, 152 a protein, 133 cyclin, 99 phosphatase, 98 ORF, 90 tumor necrosis factor, 89 cis, 88 Ca2, 86 Asp, 81 embryonic        | 1552 ras, 471 myc, 359 PCR, 80 Ca2, 62 RAS, 62 HCC, 56 fos, 56 cyclin, 55 cis, 54 GGT                                                                       | 33 cis, 25 PCR, 21 a protein, 18 cyclin, 17 ORF, 13 Asp, 13 protein kinase, 13 phosphatase, 12 EBP, 12 prolactin                          | 87 CD4, 39 IL-2, 38 p65, 36 Th1, 31 EBP, 28 AP-1, 25 p50, 24 IL-4, 24 CTL, 23 CD28                                     |
| GP7   | 1234 has, 940 mRNA, 725 receptor, 569 in vitro, 460 enzyme, 431 cDNA, 427 RNA, 417 Escherichia coli, 393 receptors, 388 conserved | 442 has, 406 mRNA, 360 PCR, 326 neuronal, 270 pancreatic, 232 receptor, 163 ras, 157 apoptosis, 152 oncogene, 140 cDNA                                      | 166 has, 75 serum, 69 conserved, 62 mRNA, 61 in vitro, 60 plasma, 51 receptor, 46 kinase                                                  | 213 lymphocytes, 190 receptor, 113 has, 105 in vitro, 93 mRNA, 89 apoptosis, 87 CD4, 77 receptors, 74 lymphoid, 74 LPS |

Table 13: **FP tagging errors (cos98)** The table gives an overview on the FP errors of the taggers (cos98 evaluation).
